# Supplementary material for: The Influence of Non-Engineered Municipal Landfills on Groundwater Chemistry and Quality in Bloemfontein, South Africa
Source: MDPI journal article supplement (doi:10.3390/molecules25235599), 2020-11-28
Supplement: s1 [file s1]

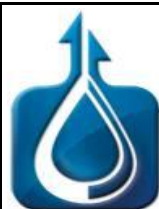

# Institute for Groundwater Studies

University of the Free State

IGS Laboratory Services, Dekaan Street (Campus)

339, BLOEMFONTEIN, 9300

+27-(0)51 - 401 2317

+27-(0)51 - 401 3005

E-mail: igslab@ufs.ac.za

Sec 5.10 F1

Revision 9

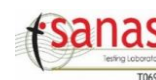

## Test Report

Case no: 2018 - 210

02/03/2018

Page 2 of 3

| Determinand                           | Units     | Methods used | South African National Standard (SANS) 241:2006 & 2015 for drinking water (partial)<br><br>Class 1 (Recommended levels)<br>Class 2 (Maximum allowable for limited time) ** EU standard | Livestock Watering Recommended values | Dwarf specifications for irrigation                       | Client sample name: |                      |                      |                      |                      |                  |                      |                      |                    |
|---------------------------------------|-----------|--------------|----------------------------------------------------------------------------------------------------------------------------------------------------------------------------------------|---------------------------------------|-----------------------------------------------------------|---------------------|----------------------|----------------------|----------------------|----------------------|------------------|----------------------|----------------------|--------------------|
|                                       |           |              |                                                                                                                                                                                        |                                       |                                                           | North Surface       | NB 03 B (1) 02-03-18 | NB 03 B (2) 02-03-18 | NB 03 D (1) 02-03-18 | NB 03 D (2) 02-03-18 | NB 06 A 02-03-18 | NB 06 B (1) 02-03-18 | NB 06 B (2) 02-03-18 | NB 07 (1) 02-03-18 |
|                                       |           |              |                                                                                                                                                                                        |                                       |                                                           | Lab number:         |                      |                      |                      |                      |                  |                      |                      |                    |
|                                       |           |              |                                                                                                                                                                                        |                                       |                                                           | 210-1               | 210-2                | 210-3                | 210-4                | 210-5                | 210-6            | 210-7                | 210-8                | 210-9              |
|                                       |           |              | Value                                                                                                                                                                                  | Value                                 | Value                                                     | Value               | Value                | Value                | Value                | Value                | Value            | Value                | Value                | Value              |
| Chemical report                       |           |              |                                                                                                                                                                                        |                                       |                                                           |                     |                      |                      |                      |                      |                  |                      |                      |                    |
| COD #                                 | mg/L      | Chem-TM04    |                                                                                                                                                                                        |                                       |                                                           | 92                  | 97                   | 64                   | 26                   | 192                  | 72               | 51                   | 22                   | 726                |
| Total organic carbon as C #           | mg/L      | Chem-TM24    | ≤ 10                                                                                                                                                                                   |                                       |                                                           | 28.1                | 18.0                 | 16.7                 | 8.37                 | 7.81                 | 11.5             | 13.1                 | 12.4                 | 83.0               |
| Ammonia as N #                        | mg/L      | Chem-TM18    | ≤ 1.5                                                                                                                                                                                  |                                       |                                                           | 0.26                | <0.5                 | <0.5                 | 1.58                 | 3.83                 | 2.81             | <0.5                 | <0.5                 | 0.55               |
| pH #                                  | pH units  | Chem-TM06    | 5.5 tot 9.7                                                                                                                                                                            |                                       | 6.5 - 8.4                                                 | 7.68                | 7.69                 | 7.67                 | 7.91                 | 7.3                  | 7.83             | 7.51                 | 7.42                 | 7.29               |
| Electrical conductivity #             | mS/m      | Chem-TM06    | ≤ 170                                                                                                                                                                                  |                                       | <40                                                       | 47.5                | 295                  | 295                  | 198                  | 177                  | 210              | 224                  | 230                  | 644                |
| Calcium as Ca #                       | mg/L      | Chem-TM02    | ≤150 - 300                                                                                                                                                                             | ≤1000                                 |                                                           | 43                  | 283                  | 274                  | 107                  | 68                   | 180              | 176                  | 173                  | 449                |
| Magnesium as Mg #                     | mg/L      | Chem-TM02    | ≤70 - 100                                                                                                                                                                              | ≤500                                  |                                                           | 19                  | 172                  | 167                  | 123                  | 118                  | 117              | 107                  | 105                  | 520                |
| Sodium as Na #                        | mg/L      | Chem-TM02    | ≤ 200                                                                                                                                                                                  | ≤2000                                 | 0 - 70                                                    | 28                  | 268                  | 261                  | 168                  | 158                  | 169              | 222                  | 219                  | 351                |
| Potassium as K #                      | mg/L      | Chem-TM02    | ≤50 - 100                                                                                                                                                                              |                                       |                                                           | 8.31                | 4.68                 | 4.41                 | 3.72                 | 3.59                 | 1.97             | 1.80                 | 1.78                 | 9.43               |
| P-Alkalinity #                        | mg/L      | Chem-TM06    |                                                                                                                                                                                        |                                       |                                                           | 0                   | 0                    | 0                    | 0                    | 0                    | 0                | 0                    | 0                    | 0                  |
| M-Alkalinity #                        | mg/L      | Chem-TM06    |                                                                                                                                                                                        |                                       |                                                           | 74.2                | 362                  | 363                  | 173                  | 74.6                 | 699              | 700                  | 709                  | 939                |
| Fluoride as F #                       | mg/L      | Chem-TM01    | ≤ 1.5                                                                                                                                                                                  | ≤2                                    |                                                           | 0.39                | 0.37                 | 0.16                 | <0.1                 | <0.1                 | 0.17             | 0.05                 | 0.24                 | 0.79               |
| Chloride as Cl #                      | mg/L      | Chem-TM01    | ≤ 300                                                                                                                                                                                  | ≤1500                                 | 0 - 105                                                   | 35                  | 317                  | 319                  | 300                  | 299                  | 349              | 421                  | 439                  | 2190               |
| Nitrite as N #                        | mg/L      | Chem-TM01    |                                                                                                                                                                                        |                                       |                                                           | <0.1                | <0.1                 | <0.1                 | <0.1                 | <0.1                 | <0.1             | <0.1                 | <0.1                 | <0.2               |
| Bromide as Br #                       | mg/L      | Chem-TM01    | **≤3                                                                                                                                                                                   |                                       |                                                           | 0.50                | 1.85                 | 2.01                 | 2.13                 | 1.91                 | 1.71             | 2.27                 | 1.93                 | 11.33              |
| Nitrate as N #                        | mg/L      | Chem-TM01    | ≤ 11                                                                                                                                                                                   | ≤22.5                                 | 0 - 5                                                     | <0.5                | 10.95                | 10.99                | 7.77                 | <0.5                 | <0.5             | <0.5                 | <0.5                 | <1                 |
| Phosphate as PO <sub>4</sub> #        | mg/L      | Chem-TM01    | *≤15.33                                                                                                                                                                                |                                       |                                                           | <1                  | <1                   | <1                   | <1                   | <1                   | <1               | <1                   | <1                   | <2                 |
| Sulphate as SO <sub>4</sub> #         | mg/L      | Chem-TM01    | ≤ 500                                                                                                                                                                                  | ≤1000                                 |                                                           | 119                 | 998                  | 998                  | 538                  | 532                  | 19.0             | 7.0                  | 3.3                  | 31.4               |
| Calcium Hardness #                    | mg/L      | calculated   | ≤375 - 750                                                                                                                                                                             |                                       |                                                           | 108                 | 708                  | 685                  | 268                  | 171                  | 449              | 441                  | 432                  | 1122               |
| Magnesium Hardness #                  | mg/L      | calculated   | ≤287 - 410                                                                                                                                                                             |                                       |                                                           | 80                  | 705                  | 683                  | 504                  | 485                  | 481              | 440                  | 432                  | 2131               |
| Total Hardness as CaCO <sub>3</sub> # | mg/L      | calculated   | ≤662 - 1160                                                                                                                                                                            |                                       |                                                           | 188                 | 1413                 | 1369                 | 772                  | 656                  | 930              | 881                  | 864                  | 3253               |
| Total Dissolved Solids #              | mg/L      | calculated   | ≤ 1200                                                                                                                                                                                 |                                       |                                                           | 324                 | 2453                 | 2435                 | 1450                 | 1256                 | 1537             | 1634                 | 1648                 | 4494               |
| Sodium Adsorption Ratio(SAR) #        |           | calculated   |                                                                                                                                                                                        | 0 - 1.5                               |                                                           | 0.88                | 3.10                 | 3.07                 | 2.63                 | 2.67                 | 2.41             | 3.25                 | 3.24                 | 2.67               |
| Aluminium as Al #                     | mg/L      | Chem-TM02    | ≤ 0.300                                                                                                                                                                                | ≤5                                    | 0 - 0.5                                                   | 0.093               | <0.020               | <0.020               | <0.020               | <0.020               | <0.020           | <0.020               | <0.020               | <0.020             |
| Arsenic as As #                       | mg/L      | Chem-TM02    | ≤ 0.010                                                                                                                                                                                | ≤1                                    | 0 - 0.1                                                   | <0.020              | <0.020               | <0.020               | <0.020               | <0.020               | <0.020           | <0.020               | <0.020               | <0.020             |
| Barium as Ba #                        | mg/L      | Chem-TM02    | ≤ 0.700                                                                                                                                                                                |                                       |                                                           | 0.042               | <0.020               | <0.020               | <0.020               | <0.020               | 0.048            | 0.026                | 0.025                | <0.020             |
| Boron as B #                          | mg/L      | Chem-TM02    | ≤ 2.400                                                                                                                                                                                |                                       | 0 - 0.5                                                   | 0.036               | 0.220                | 0.222                | 0.121                | 0.089                | 0.082            | 0.098                | 0.086                | 0.169              |
| Cadmium as Cd #                       | mg/L      | Chem-TM02    | ≤ 0.003                                                                                                                                                                                |                                       |                                                           | <0.003              | <0.003               | <0.003               | <0.003               | <0.003               | <0.003           | <0.003               | <0.003               | <0.003             |
| Cobalt as Co #                        | mg/L      | Chem-TM02    | ≤ 0.500                                                                                                                                                                                |                                       |                                                           | <0.020              | <0.020               | <0.020               | <0.020               | <0.020               | <0.020           | <0.020               | <0.020               | <0.020             |
| Chromium as Cr #                      | mg/L      | Chem-TM02    | ≤ 0.050                                                                                                                                                                                | ≤0.05                                 |                                                           | <0.020              | <0.020               | <0.020               | <0.020               | <0.020               | <0.020           | <0.020               | <0.020               | <0.020             |
| Copper as Cu #                        | mg/L      | Chem-TM02    | ≤ 2.000                                                                                                                                                                                | ≤0.5                                  | 0 - 0.2                                                   | 0.039               | 0.029                | 0.026                | 0.023                | 0.033                | 0.014            | 0.011                | 0.017                | 0.036              |
| Iron as Fe #                          | mg/L      | Chem-TM02    | ≤ 2.000 (chronic health)                                                                                                                                                               | ≤10                                   | 0 - 0.5                                                   | 0.159               | 0.097                | 0.014                | 0.036                | 0.043                | 0.008            | 0.007                | 0.068                | 0.109              |
|                                       | mg/L      | Chem-TM02    | ≤ 0.300 (aesthetic)                                                                                                                                                                    |                                       |                                                           | <0.020              | <0.020               | <0.020               | 0.227                | 0.435                | 1.839            | 0.089                | 0.105                | 5.185              |
| Manganese as Mn #                     | mg/L      | Chem-TM02    | ≤ 0.400 (Chronic health)                                                                                                                                                               |                                       |                                                           |                     |                      |                      |                      |                      |                  |                      |                      |                    |
|                                       | mg/L      | Chem-TM02    | ≤ 0.100 (Aesthetic)                                                                                                                                                                    | ≤10                                   |                                                           | <0.020              | 0.034                | 0.034                | <0.020               | <0.020               | 0.088            | 0.028                | 0.025                | 0.218              |
| Nickel as Ni #                        | mg/L      | Chem-TM02    | ≤ 0.070                                                                                                                                                                                |                                       |                                                           |                     |                      |                      |                      |                      |                  |                      |                      |                    |
| Molybdenum as Mo #                    | mg/L      | Chem-TM02    |                                                                                                                                                                                        | ≤0.01                                 | 0 - 0.02                                                  | <0.020              | <0.020               | <0.020               | <0.020               | <0.020               | <0.020           | <0.020               | <0.020               | <0.020             |
| Lead as Pb #                          | mg/L      | Chem-TM02    | ≤ 0.010                                                                                                                                                                                | ≤0.1                                  | 0 - 0.2                                                   | <0.015              | <0.015               | <0.015               | <0.015               | <0.015               | <0.015           | <0.015               | <0.015               | <0.015             |
| Selenium as Se #                      | mg/L      | Chem-TM02    | ≤ 0.040                                                                                                                                                                                |                                       |                                                           | <0.020              | <0.020               | <0.020               | <0.020               | <0.020               | <0.020           | <0.020               | <0.020               | <0.020             |
| Vanadium as V #                       | mg/L      | Chem-TM02    | ≤ 0.200                                                                                                                                                                                |                                       |                                                           | 0.013               | 0.008                | 0.007                | 0.220                | 0.426                | 1.803            | 0.085                | 0.100                | 5.067              |
| Zinc as Zn #                          | mg/L      | Chem-TM02    | ≤ 5.000                                                                                                                                                                                | ≤20                                   | 0 - 1.0                                                   | 0.020               | <0.020               | <0.020               | <0.020               | <0.020               | <0.020           | <0.020               | <0.020               | <0.020             |
| Bacterial report:                     |           |              |                                                                                                                                                                                        |                                       |                                                           |                     |                      |                      |                      |                      |                  |                      |                      |                    |
| Total coliform                        | cfu/100ml | BAC-TM02     | ≤10                                                                                                                                                                                    | ≤10                                   | specifications will vary with the kind of crop irrigated. | >2420               | >2420                | >2420                | 99                   | 74                   | 22               | 488                  | 517                  | >2420              |
| E. coli                               | cfu/100ml | BAC-TM02     | 0                                                                                                                                                                                      | 0                                     |                                                           | 613                 | 0                    | 0                    | 0                    | 0                    | 0                | 0                    | 0                    | 0                  |

### Note:

Results marked with (#) in this report, are not included in the SANAS Schedule of Accreditation for this laboratory.

Parameters higher than the specifications, are clearly marked. Tables with specifications included for comparison.

Bacteriological results obtained from samples older than the prescribed 24 hours may be inaccurate.

Signature: \_\_\_\_\_

Dr L. Deyssel (Technical signatory / Technical manager)

END OF REPORT
