# Supplementary material for: The Influence of Non-Engineered Municipal Landfills on Groundwater Chemistry and Quality in Bloemfontein, South Africa
Source: MDPI journal article supplement (doi:10.3390/molecules25235599), 2020-11-28
Supplement: s1 [file s1]

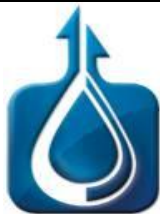

# Institute for Groundwater Studies

University of the Free State

IGS Laboratory Services, Dekaan Street (Campus)

339, BLOEMFONTEIN, 9300

+27-(0)51 - 401 2317

+27-(0)51 - 401 3005

igslab@ufs.ac.za

Sec 5.10 F1

Revision 9

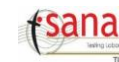

## Test Report

Case no: 2018 - 546

19/06/2018

Page 2 of 2

| Determinand                           | Units     | Methods used | South African National Standard (SANS) 241:2006&2015 for drinking water (partial) | Client sample name:                                                                      |                  |                  |                  |                  |                  |                  |                  |                |                |                  |                  |                  |                  |                  |                  |                        |                        |
|---------------------------------------|-----------|--------------|-----------------------------------------------------------------------------------|------------------------------------------------------------------------------------------|------------------|------------------|------------------|------------------|------------------|------------------|------------------|----------------|----------------|------------------|------------------|------------------|------------------|------------------|------------------|------------------------|------------------------|
|                                       |           |              |                                                                                   | NB 03 A 19/06/18                                                                         | NB 03 A 19/06/18 | NB 03 B 19/06/18 | NB 03 B 19/06/18 | NB 06 A 19/06/18 | NB 06 A 19/06/18 | NB 06 B 19/06/18 | NB 06 B 19/06/18 | NB 07 19/06/18 | NB 07 19/06/18 | SB 07 A 19/06/18 | SB 07 A 19/06/18 | SB 08 A 19/06/18 | SB 08 A 19/06/18 | SB 08 B 19/06/18 | SB 08 B 19/06/18 | Surface North 19/06/18 | Surface North 19/06/18 |
|                                       |           |              |                                                                                   | Lab number:                                                                              |                  |                  |                  |                  |                  |                  |                  |                |                |                  |                  |                  |                  |                  |                  |                        |                        |
|                                       |           |              |                                                                                   | Class 1 (Recommended levels) Class 2 (Maximum allowable for limited time) ** EU standard | 546-1 (a)        | 546-1 (b)        | 546-2 (a)        | 546-2 (b)        | 546-3 (a)        | 546-3 (b)        | 546-4 (a)        | 546-4 (b)      | 546-5 (a)      | 546-5 (b)        | 546-6 (a)        | 546-6 (b)        | 546-7 (a)        | 546-7 (b)        | 546-8 (a)        | 546-8 (b)              | 546-9 (a)              |
|                                       |           |              | Value                                                                             | Value                                                                                    | Value            | Value            | Value            | Value            | Value            | Value            | Value            | Value          | Value          | Value            | Value            | Value            | Value            | Value            | Value            | Value                  |                        |
| Chemical report                       |           |              |                                                                                   |                                                                                          |                  |                  |                  |                  |                  |                  |                  |                |                |                  |                  |                  |                  |                  |                  |                        |                        |
| pH #                                  | pH units  | Chem-TM06    | 5.5 tot 9.7                                                                       | 7.89                                                                                     | 7.88             | 7.79             | 7.72             | 7.47             | 7.39             | 7.35             | 7.43             | 7.25           | 7.17           | 7.16             | 7.13             | 7.71             | 7.63             | 7.65             | 7.61             | 7.93                   | 8.00                   |
| Electrical conductivity #             | mS/m      | Chem-TM06    | ≤ 170                                                                             | 194                                                                                      | 181              | 275              | 283              | 218              | 216              | 217              | 214              | 557            | 543            | 261              | 257              | 83.98            | 82.84            | 76.93            | 78.29            | 38.8                   | 38.7                   |
| Calcium as Ca #                       | mg/L      | Chem-TM02    | ≤150 - 300                                                                        | 119                                                                                      | 87               | 236              | 246              | 155              | 151              | 160              | 141              | 385            | 396            | 257              | 262              | 75.0             | 80.4             | 76.0             | 74.2             | 41.2                   | 42.3                   |
| Magnesium as Mg #                     | mg/L      | Chem-TM02    | ≤70 - 100                                                                         | 115                                                                                      | 108              | 154              | 156              | 101              | 98               | 103              | 91               | 403            | 407            | 110              | 110              | 32.1             | 34.0             | 32.8             | 32.6             | 15.8                   | 16.3                   |
| Sodium as Na #                        | mg/L      | Chem-TM02    | ≤ 200                                                                             | 127                                                                                      | 105              | 222              | 247              | 129              | 127              | 170              | 159              | 270            | 274            | 63               | 62               | 57.8             | 59.9             | 62.1             | 61.4             | 17.1                   | 17.7                   |
| Potassium as K #                      | mg/L      | Chem-TM02    | ≤50 - 100                                                                         | 3.3                                                                                      | 3.0              | 5.7              | 4.6              | 1.0              | 0.9              | 0.5              | 0.6              | 7.9            | 7.8            | 4.7              | 4.5              | 1.4              | 1.4              | 1.8              | 1.8              | 4.7                    | 5.0                    |
| P-Alkalinity #                        | mg/L      | Chem-TM06    |                                                                                   | 0                                                                                        | 0                | 0                | 0                | 0                | 0                | 0                | 0                | 0              | 0              | 0                | 0                | 0                | 0                | 0                | 0                | 0                      | 0                      |
| M-Alkalinity #                        | mg/L      | Chem-TM06    |                                                                                   | 129                                                                                      | 73               | 464              | 492              | 601              | 591              | 564              | 573              | 652            | 669            | 474              | 465              | 254              | 264              | 331              | 338              | 128                    | 129                    |
| Fluoride as F #                       | mg/L      | Chem-TM01    | ≤ 1.5                                                                             | <0.1                                                                                     | <0.1             | <0.1             | 0.17             | <0.1             | <0.1             | <0.1             | <0.1             | <0.1           | <0.1           | <0.1             | <0.1             | 0.65             | 0.50             | 0.37             | 0.42             | 0.04                   | 0.07                   |
| Chloride as Cl #                      | mg/L      | Chem-TM01    | ≤ 300                                                                             | 288                                                                                      | 269              | 290              | 293              | 347              | 346              | 408              | 415              | 1677           | 1636           | 568              | 565              | 79.8             | 79.7             | 75.4             | 74.1             | 22.6                   | 22.5                   |
| Nitrite as N #                        | mg/L      | Chem-TM01    |                                                                                   | -0.1                                                                                     | -0.1             | -0.1             | -0.1             | -0.1             | -0.1             | -0.1             | -0.1             | -0.1           | -0.1           | -0.1             | -0.1             | -0.01            | -0.01            | -0.01            | -0.01            | -0.01                  | -0.01                  |
| Bromide as Br #                       | mg/L      | Chem-TM01    | **≤3                                                                              | 2.37                                                                                     | 2.71             | 1.58             | 2.05             | 1.80             | 1.61             | 2.51             | 2.55             | 8.24           | 8.54           | 4.24             | 4.20             | 0.41             | 0.39             | 0.31             | 0.31             | 0.03                   | 0.10                   |
| Nitrate as N #                        | mg/L      | Chem-TM01    | ≤ 11                                                                              | 10.49                                                                                    | 3.40             | 3.40             | 5.19             | 0.02             | 0.14             | 0.05             | 0.06             | 0.04           | 0.11           | 0.01             | 0.07             | 5.76             | 5.86             | 2.40             | 2.93             | 0.05                   | 0.06                   |
| Phosphate as PO <sub>4</sub> #        | mg/L      | Chem-TM01    | *≤15.33                                                                           | -1                                                                                       | -1               | -1               | -1               | -1               | -1               | 1.56             | -1               | -1             | -1             | -1               | 1.05             | -0.1             | -0.1             | 0.12             | -0.1             | -0.1                   | -0.1                   |
| Sulphate as SO <sub>4</sub> #         | mg/L      | Chem-TM01    | ≤ 500                                                                             | 537.3                                                                                    | 500.7            | 975.0            | 953.2            | 9.7              | 12.3             | 8.6              | 8.2              | 30.7           | 34.9           | 1.2              | 1.3              | 51.2             | 51.4             | 48.9             | 46.5             | 47.6                   | 47.6                   |
| Calcium Hardness #                    | mg/L      | calculated   | ≤375 - 750                                                                        | 297                                                                                      | 217              | 590              | 616              | 389              | 377              | 400              | 352              | 962            | 990            | 643              | 654              | 187              | 201              | 190              | 185              | 103                    | 106                    |
| Magnesium Hardness #                  | mg/L      | calculated   | ≤287 - 410                                                                        | 472                                                                                      | 442              | 632              | 639              | 412              | 401              | 423              | 372              | 1652           | 1669           | 450              | 452              | 132              | 139              | 134              | 134              | 65                     | 67                     |
| Total Hardness as CaCO <sub>3</sub> # | mg/L      | calculated   | ≤662 - 1160                                                                       | 768                                                                                      | 659              | 1223             | 1255             | 801              | 778              | 823              | 724              | 2615           | 2659           | 1093             | 1106             | 319              | 340              | 324              | 319              | 168                    | 173                    |
| Total Dissolved Solids #              | mg/L      | calculated   | ≤ 1200                                                                            | 1365                                                                                     | 1161             | 2362             | 2415             | 1344             | 1327             | 1418             | 1388             | 3433           | 3432           | 1480             | 1475             | 578              | 598              | 639              | 642              | 277                    | 281                    |
| Total organic carbon as C #           | mg/L      | Chem-TM24    | ≤ 10                                                                              | 8.76                                                                                     | 7.82             | 14.68            | 14.49            | 10.26            | 10.59            | 12.26            | 13.15            | 77.4           | 77.1           | 17.51            | 16.78            | 2.29             | 2.23             | 2.85             | 2.32             | 9.25                   | 8.27                   |
| Chemical oxygen demand #              | mg/L      |              |                                                                                   | 38                                                                                       | 29               | 77               | 69               | 82               | 83               | 50               | 64               | 256            | 262            | 71               | 78               | 9                | 9                | 16               | 11               | 30                     | 32                     |
| Aluminium as Al #                     | mg/L      | Chem-TM02    | ≤ 0.300                                                                           | <0.020                                                                                   | <0.020           | <0.020           | <0.020           | <0.020           | <0.020           | <0.020           | <0.020           | <0.020         | <0.020         | <0.020           | <0.020           | <0.020           | <0.020           | <0.020           | <0.020           | 0.071                  | 0.083                  |
| Arsenic as As #                       | mg/L      | Chem-TM02    | ≤ 0.010                                                                           | <0.020                                                                                   | <0.020           | <0.020           | <0.020           | <0.020           | <0.020           | <0.020           | <0.020           | <0.020         | <0.020         | 0.024            | 0.025            | <0.020           | <0.020           | <0.020           | <0.020           | <0.020                 | <0.020                 |
| Barium as Ba #                        | mg/L      | Chem-TM02    | ≤ 0.700                                                                           | 0.010                                                                                    | 0.007            | 0.003            | 0.003            | 0.042            | 0.042            | 0.029            | 0.028            | 0.017          | 0.017          | 0.181            | 0.186            | 0.132            | 0.139            | 0.098            | 0.087            | 0.038                  | 0.039                  |
| Boron as B #                          | mg/L      | Chem-TM02    | ≤ 2.400                                                                           | 0.068                                                                                    | 0.023            | 0.144            | 0.162            | <0.040           | <0.040           | <0.040           | <0.040           | 0.107          | 0.080          | <0.040           | <0.040           | 0.046            | 0.050            | <0.040           | <0.040           | <0.040                 | <0.040                 |
| Cadmium as Cd #                       | mg/L      | Chem-TM02    | ≤ 0.003                                                                           | 0.007                                                                                    | 0.006            | <0.003           | <0.003           | <0.003           | <0.003           | <0.003           | <0.003           | <0.003         | <0.003         | <0.003           | <0.003           | <0.003           | <0.003           | <0.003           | <0.003           | <0.003                 | <0.003                 |
| Cobalt as Co #                        | mg/L      | Chem-TM02    | ≤ 0.500                                                                           | <0.020                                                                                   | <0.020           | <0.020           | <0.020           | <0.020           | <0.020           | <0.020           | <0.020           | <0.020         | <0.020         | <0.020           | <0.020           | <0.020           | <0.020           | <0.020           | <0.020           | <0.020                 | <0.020                 |
| Chromium as Cr #                      | mg/L      | Chem-TM02    | ≤ 0.050                                                                           | <0.020                                                                                   | <0.020           | <0.020           | <0.020           | <0.020           | <0.020           | <0.020           | <0.020           | <0.020         | <0.020         | <0.020           | <0.020           | <0.020           | <0.020           | <0.020           | <0.020           | <0.020                 | <0.020                 |
| Copper as Cu #                        | mg/L      | Chem-TM02    | ≤ 2.000                                                                           | 0.028                                                                                    | 0.032            | 0.033            | 0.035            | 0.022            | 0.021            | 0.016            | 0.025            | 0.040          | 0.040          | 0.038            | 0.027            | 0.011            | 0.003            | 0.000            | 0.001            | 0.010                  | 0.015                  |
| Iron as Fe #                          | mg/L      | Chem-TM02    | ≤ 2.000 (chronic health)                                                          | 0.053                                                                                    | 0.033            | 0.057            | 0.067            | 0.029            | 0.023            | 0.140            | 0.221            | 0.047          | 0.064          | 0.046            | 0.034            | 0.043            | <0.020           | 0.024            | 0.025            | 0.108                  | 0.122                  |
|                                       | mg/L      | Chem-TM02    | ≤ 0.300 (aesthetic)                                                               |                                                                                          |                  |                  |                  |                  |                  |                  |                  |                |                |                  |                  |                  |                  |                  |                  |                        |                        |
| Manganese as Mn #                     | mg/L      | Chem-TM02    | ≤ 0.400 (Chronic health)                                                          | 0.087                                                                                    | 0.185            | 0.368            | 0.257            | 1.044            | 0.966            | 0.096            | 0.085            | 2.643          | 2.399          | 1.609            | 1.724            | <0.020           | <0.020           | <0.020           | <0.020           | 0.022                  | 0.022                  |
|                                       | mg/L      | Chem-TM02    | ≤ 0.100 (Aesthetic)                                                               |                                                                                          |                  |                  |                  |                  |                  |                  |                  |                |                |                  |                  |                  |                  |                  |                  |                        |                        |
| Nickel as Ni #                        | mg/L      | Chem-TM02    | ≤ 0.070                                                                           | 0.061                                                                                    | 0.028            | 0.113            | 0.096            | 0.127            | 0.120            | 0.074            | 0.070            | 0.273          | 0.231          | 0.089            | 0.081            | 0.064            | 0.058            | 0.053            | 0.043            | 0.023                  | <0.020                 |
| Lead as Pb #                          | mg/L      | Chem-TM02    | ≤ 0.010                                                                           | <0.015                                                                                   | <0.015           | <0.015           | <0.015           | 0.022            | <0.015           | 0.014            | 0.032            | 0.033          | 0.035          | 0.020            | 0.027            | 0.048            | 0.021            | 0.042            | 0.018            | 0.018                  | <0.015                 |
| Selenium as Se #                      | mg/L      | Chem-TM02    | ≤ 0.040                                                                           | <0.020                                                                                   | <0.020           | <0.020           | <0.020           | <0.020           | <0.020           | <0.020           | <0.020           | <0.020         | <0.020         | <0.020           | <0.020           | <0.020           | <0.020           | <0.020           | <0.020           | <0.020                 | <0.020                 |
| Strontium as Sr #                     | mg/L      | Chem-TM02    |                                                                                   | 0.398                                                                                    | 0.255            | 0.867            | 0.915            | 0.461            | 0.449            | 0.410            | 0.381            | 1.125          | 1.040          | 2.121            | 2.127            | 0.644            | 0.681            | 0.545            | 0.507            | 0.104                  | 0.106                  |
| Silicon as Si #                       | mg/L      | Chem-TM02    |                                                                                   | 4.25                                                                                     | 2.34             | 12.67            | 13.08            | 19.45            | 18.76            | 15.01            | 13.37            | 15.94          | 14.64          | 13.34            | 13.22            | 14.22            | 15.88            | 11.91            | 12.33            | 5.33                   | 5.31                   |
| Vanadium as V #                       | mg/L      | Chem-TM02    | ≤ 0.200                                                                           | 0.078                                                                                    | 0.170            | 0.353            | 0.246            | 1.027            | 0.944            | 0.090            | 0.077            | 2.551          | 2.313          | 1.669            | 1.770            | 0.026            | 0.038            | 0.036            | 0.032            | 0.049                  | 0.050                  |
| Zinc as Zn #                          | mg/L      | Chem-TM02    | ≤ 5.000                                                                           | <0.020                                                                                   | <0.020           | <0.020           | <0.020           | <0.020           | <0.020           | <0.020           | <0.020           | <0.020         | <0.020         | 0.020            | 0.024            | <0.020           | <0.020           | <0.020           | <0.020           | <0.020                 | <0.020                 |
| Bacterial report:                     |           |              |                                                                                   |                                                                                          |                  |                  |                  |                  |                  |                  |                  |                |                |                  |                  |                  |                  |                  |                  |                        |                        |
| Total coliform                        | cfu/100ml | BAC-TM02     | ≤10                                                                               | 1300                                                                                     | >2420            | 2420             | >2420            | 39               | 33               | 31               | 26               | 0              | 3              | 2420             | >2420            | 1300             | 488              | 411              | 270              | 687                    | 1553                   |
| E. coli                               | cfu/100ml | BAC-TM02     | 0                                                                                 | 0                                                                                        | 0                | 0                | 0                | 0                | 0                | 0                | 0                | 0              | 0              | 6                | 7                | 71               | 51               | 5                | 7                | 13                     | 18                     |

### Note:

Results marked with (#) in this report, are not included in the SANAS Schedule of Accreditation for this laboratory.

Parameters higher than the specifications, are clearly marked. Table with specifications included for comparison.

Bacteriological results obtained from samples older than the prescribed 24 hours may be inaccurate.

Signature: \_\_\_\_\_  
Dr L Deyzel (Technical signatory / Technical manager)

END OF REPORT

| From: DWAF Domestic use guidelines |                |                         |                |
|------------------------------------|----------------|-------------------------|----------------|
| Description of Hardness            | Hardness Range | Description of Hardness | Hardness Range |
| Soft                               | 0 - 50         | Moderately hard         | 150 - 200      |
| Moderately soft                    | 50 - 100       | Hard                    | 200 - 300      |
| Slightly hard                      | 100 - 150      | Very hard               | > 300          |
