# Supplementary material for: The Influence of Non-Engineered Municipal Landfills on Groundwater Chemistry and Quality in Bloemfontein, South Africa
Source: MDPI journal article supplement (doi:10.3390/molecules25235599), 2020-11-28
Supplement: s1 [file s1]

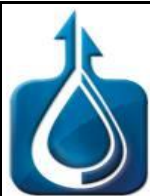

# Institute for Groundwater Studies

University of the Free State

IGS Laboratory Services, Dekaan Street (Campus)

339, BLOEMFONTEIN, 9300

+27-(0)51 - 401 2317

+27-(0)51 - 401 3005

E-mail: igslab@ufs.ac.za

Sec 5.10 F1

Revision 9

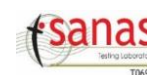

## Test Report

Case no: 2018 - 210

02/03/2018

Page 3 of 3

| Determinand                           | Units     | Methods used | South African National Standard (SANS) 241:2006 & 2015 for drinking water (partial)<br><br>Class 1 (Recommended levels)<br>Class 2 (Maximum allowable for limited time) ** EU standard | Livestock Watering Recommended values | Dwarf specifications for irrigation                       | Client sample name:  |                      |                  |                  |                      |                      |        |
|---------------------------------------|-----------|--------------|----------------------------------------------------------------------------------------------------------------------------------------------------------------------------------------|---------------------------------------|-----------------------------------------------------------|----------------------|----------------------|------------------|------------------|----------------------|----------------------|--------|
|                                       |           |              |                                                                                                                                                                                        |                                       |                                                           | SB 08 A (1) 02-03-18 | SB 06 A (2) 02-03-18 | SB 05 A 02-03-18 | SB 05 B 02-03-18 | SB 08 B (1) 02-03-18 | SB 08 B (2) 02-03-18 | NB 07  |
|                                       |           |              |                                                                                                                                                                                        |                                       |                                                           | Lab number:          |                      |                  |                  |                      |                      |        |
|                                       |           |              |                                                                                                                                                                                        |                                       |                                                           | 210-10               | 210-11               | 210-12           | 210-13           | 210-14               | 210-15               | 210-16 |
|                                       |           |              | Value                                                                                                                                                                                  | Value                                 | Value                                                     | Value                | Value                | Value            | Value            | Value                | Value                | Value  |
| <b>Chemical report</b>                |           |              |                                                                                                                                                                                        |                                       |                                                           |                      |                      |                  |                  |                      |                      |        |
| COD #                                 | mg/L      | Chem-TM04    |                                                                                                                                                                                        |                                       |                                                           | 17                   | 15                   | 55               | 50               | 2                    | 3                    | 299    |
| Total organic carbon as C #           | mg/L      | Chem-TM24    | ≤ 10                                                                                                                                                                                   |                                       |                                                           | 2.42                 | 2.34                 | 15.9             | 17.0             | 2.19                 | 2.36                 | 81.5   |
| Ammonia as N #                        | mg/L      | Chem-TM18    | ≤ 1.5                                                                                                                                                                                  |                                       |                                                           | <0.5                 | <0.5                 | <0.5             | <0.5             | <0.5                 | <0.5                 | 0.63   |
| pH #                                  | pH units  | Chem-TM06    | 5.5 tot 9.7                                                                                                                                                                            |                                       | 6.5 - 8.4                                                 | 8.14                 | 8.01                 | 7.54             | 7.34             | 7.98                 | 8.09                 | 7.45   |
| Electrical conductivity #             | mS/m      | Chem-TM06    | ≤ 170                                                                                                                                                                                  |                                       | <40                                                       | 67.6                 | 66.9                 | 238              | 241              | 78.7                 | 110                  | 643    |
| Calcium as Ca #                       | mg/L      | Chem-TM02    | ≤150 - 300                                                                                                                                                                             | ≤1000                                 |                                                           | 56.5                 | 57.0                 | 298              | 308              | 68.9                 | 92.5                 | 451    |
| Magnesium as Mg #                     | mg/L      | Chem-TM02    | ≤70 - 100                                                                                                                                                                              | ≤500                                  |                                                           | 20.0                 | 20.3                 | 129              | 132              | 31.3                 | 35.2                 | 520    |
| Sodium as Na #                        | mg/L      | Chem-TM02    | ≤ 200                                                                                                                                                                                  | ≤2000                                 | 0 - 70                                                    | 79.0                 | 74.2                 | 77.2             | 78.6             | 65.7                 | 107                  | 352    |
| Potassium as K #                      | mg/L      | Chem-TM02    | ≤50 - 100                                                                                                                                                                              |                                       |                                                           | 1.57                 | 1.42                 | 5.16             | 5.29             | 2.00                 | 2.29                 | 8.22   |
| P-Alkalinity #                        | mg/L      | Chem-TM06    |                                                                                                                                                                                        |                                       |                                                           | 0                    | 0                    | 0                | 0                | 0                    | 0                    | 0      |
| M-Alkalinity #                        | mg/L      | Chem-TM06    |                                                                                                                                                                                        |                                       |                                                           | 238                  | 236                  | 617              | 624              | 254                  | 298                  | 1216   |
| Fluoride as F #                       | mg/L      | Chem-TM01    | ≤ 1.5                                                                                                                                                                                  | ≤2                                    |                                                           | 0.93                 | 0.98                 | 0.25             | 0.07             | 0.55                 | 0.04                 | <0.20  |
| Chloride as Cl #                      | mg/L      | Chem-TM01    | ≤ 300                                                                                                                                                                                  | ≤1500                                 | 0 - 105                                                   | 59                   | 57                   | 537              | 542              | 85                   | 161                  | 2176   |
| Nitrite as N #                        | mg/L      | Chem-TM01    |                                                                                                                                                                                        |                                       |                                                           | <0.01                | <0.01                | <0.1             | <0.1             | <0.01                | <0.1                 | <0.2   |
| Bromide as Br #                       | mg/L      | Chem-TM01    | **≤3                                                                                                                                                                                   |                                       |                                                           | 0.30                 | 0.30                 | 3.86             | 4.23             | 0.40                 | 0.53                 | 11.18  |
| Nitrate as N #                        | mg/L      | Chem-TM01    | ≤ 11                                                                                                                                                                                   | ≤22.5                                 | 0 - 5                                                     | 0.13                 | 0.09                 | 0.76             | 0.63             | 1.99                 | 7.92                 | <1     |
| Phosphate as PO <sub>4</sub> #        | mg/L      | Chem-TM01    | *≤15.33                                                                                                                                                                                |                                       |                                                           | <0.1                 | <0.1                 | <1               | <1               | <0.1                 | <1                   | <2     |
| Sulphate as SO <sub>4</sub> #         | mg/L      | Chem-TM01    | ≤ 500                                                                                                                                                                                  | ≤1000                                 |                                                           | 52.8                 | 52.8                 | 29.8             | 27.8             | 52.2                 | 56.4                 | 28.6   |
| Calcium Hardness #                    | mg/L      | calculated   | ≤375 - 750                                                                                                                                                                             |                                       |                                                           | 141                  | 142                  | 744              | 769              | 172                  | 231                  | 1128   |
| Magnesium Hardness #                  | mg/L      | calculated   | ≤287 - 410                                                                                                                                                                             |                                       |                                                           | 82                   | 83                   | 527              | 543              | 128                  | 144                  | 2133   |
| Total Hardness as CaCO <sub>3</sub> # | mg/L      | calculated   | ≤662 - 1160                                                                                                                                                                            |                                       |                                                           | 223                  | 226                  | 1271             | 1312             | 300                  | 376                  | 3261   |
| Total Dissolved Solids #              | mg/L      | calculated   | ≤ 1200                                                                                                                                                                                 |                                       |                                                           | 508                  | 499                  | 1697             | 1722             | 568                  | 786                  | 4757   |
| Sodium Adsorption Ratio(SAR) #        |           | calculated   |                                                                                                                                                                                        |                                       | 0 - 1.5                                                   | 2.30                 | 2.15                 | 0.94             | 0.94             | 1.65                 | 2.40                 | 2.68   |
| Aluminium as Al #                     | mg/L      | Chem-TM02    | ≤ 0.300                                                                                                                                                                                | ≤5                                    | 0 - 0.5                                                   | <0.020               | <0.020               | <0.020           | <0.020           | <0.020               | <0.020               | <0.020 |
| Arsenic as As #                       | mg/L      | Chem-TM02    | ≤ 0.010                                                                                                                                                                                | ≤1                                    | 0 - 0.1                                                   | <0.020               | <0.020               | <0.020           | <0.020           | <0.020               | <0.020               | <0.020 |
| Barium as Ba #                        | mg/L      | Chem-TM02    | ≤ 0.700                                                                                                                                                                                |                                       |                                                           | 0.120                | 0.120                | 0.177            | 0.183            | 0.079                | 0.145                | <0.020 |
| Boron as B #                          | mg/L      | Chem-TM02    | ≤ 2.400                                                                                                                                                                                |                                       | 0 - 0.5                                                   | 0.209                | 0.204                | 0.081            | 0.072            | 0.094                | 0.116                | 0.181  |
| Cadmium as Cd #                       | mg/L      | Chem-TM02    | ≤ 0.003                                                                                                                                                                                |                                       |                                                           | <0.003               | <0.003               | <0.003           | <0.003           | <0.003               | <0.003               | <0.003 |
| Cobalt as Co #                        | mg/L      | Chem-TM02    | ≤ 0.500                                                                                                                                                                                |                                       |                                                           | <0.020               | <0.020               | <0.020           | <0.020           | <0.020               | <0.020               | <0.020 |
| Chromium as Cr #                      | mg/L      | Chem-TM02    | ≤ 0.050                                                                                                                                                                                | ≤0.05                                 |                                                           | <0.020               | <0.020               | <0.020           | <0.020           | <0.020               | <0.020               | <0.020 |
| Copper as Cu #                        | mg/L      | Chem-TM02    | ≤ 2.000                                                                                                                                                                                | ≤0.5                                  | 0 - 0.2                                                   | 0.011                | 0.008                | 0.018            | 0.018            | 0.013                | 0.015                | 0.042  |
| Iron as Fe #                          | mg/L      | Chem-TM02    | ≤ 2,000 (chronic health)                                                                                                                                                               | ≤10                                   | 0 - 0.5                                                   | <0.020               | <0.020               | 0.061            | 0.041            | <0.020               | <0.020               | 0.090  |
|                                       | mg/L      | Chem-TM02    | ≤ 0.300 (aesthetic)                                                                                                                                                                    |                                       |                                                           |                      |                      |                  |                  |                      |                      |        |
| Manganese as Mn #                     | mg/L      | Chem-TM02    | ≤ 0.400 (Chronic health)                                                                                                                                                               |                                       |                                                           | 0.034                | 0.033                | 2.415            | 2.547            | <0.020               | 0.070                | 5.366  |
|                                       | mg/L      | Chem-TM02    | ≤ 0.100 (Aesthetic)                                                                                                                                                                    | ≤10                                   |                                                           |                      |                      |                  |                  |                      |                      |        |
| Nickel as Ni #                        | mg/L      | Chem-TM02    | ≤ 0.070                                                                                                                                                                                |                                       |                                                           | <0.020               | <0.020               | 0.026            | 0.028            | <0.020               | <0.020               | 0.223  |
| Molybdenum as Mo #                    | mg/L      | Chem-TM02    |                                                                                                                                                                                        | ≤0.01                                 | 0 - 0.02                                                  | <0.020               | <0.020               | <0.020           | <0.020           | <0.020               | <0.020               | <0.020 |
| Lead as Pb #                          | mg/L      | Chem-TM02    | ≤ 0.010                                                                                                                                                                                | ≤0.1                                  | 0 - 0.2                                                   | <0.015               | <0.015               | <0.015           | <0.015           | <0.015               | <0.015               | <0.015 |
| Selenium as Se #                      | mg/L      | Chem-TM02    | ≤ 0.040                                                                                                                                                                                |                                       |                                                           | <0.020               | <0.020               | <0.020           | <0.020           | <0.020               | <0.020               | <0.020 |
| Vanadium as V #                       | mg/L      | Chem-TM02    | ≤ 0.200                                                                                                                                                                                |                                       |                                                           | 0.032                | 0.031                | 2.336            | 2.491            | <0.010               | 0.068                | 5.178  |
| Zinc as Zn #                          | mg/L      | Chem-TM02    | ≤ 5.000                                                                                                                                                                                | ≤20                                   | 0 - 1.0                                                   | <0.020               | <0.020               | <0.020           | <0.020           | <0.020               | <0.020               | <0.020 |
| <b>Bacterial report:</b>              |           |              |                                                                                                                                                                                        |                                       |                                                           |                      |                      |                  |                  |                      |                      |        |
| Total coliform                        | cfu/100ml | BAC-TM02     | ≤10                                                                                                                                                                                    | ≤10                                   | specifications will vary with the kind of crop irrigated. | 649                  | 1120                 | >2420            | >2420            | 43                   | 36                   |        |
| E. coli                               | cfu/100ml | BAC-TM02     | 0                                                                                                                                                                                      | 0                                     |                                                           | 1                    | 1                    | 308              | 261              | 1                    | 0                    |        |

### Note:

Results marked with (#) in this report, are not included in the SANAS Schedule of Accreditation for this laboratory.

Parameters higher than the specifications, are clearly marked. Tables with specifications included for comparison.

Bacteriological results obtained from samples older than the prescribed 24 hours may be inaccurate.

Signature: \_\_\_\_\_

Dr L Deyzel (Technical signatory / Technical manager)

END OF REPORT

| From: DWAF Domestic use guidelines |               |                         |                |
|------------------------------------|---------------|-------------------------|----------------|
| Description of Hardness            | Hardness Rang | Description of Hardness | Hardness Range |
| Soft                               | 0 - 50        | Moderately hard         | 150 - 200      |
| Moderately soft                    | 50 - 100      | Hard                    | 200 - 300      |
| Slightly hard                      | 100 - 150     | Very hard               | > 300          |
| Moderately hard                    | 150 - 200     |                         |                |
| Hard                               | 200 - 300     |                         |                |
| Very hard                          | > 300         |                         |                |

|                                                                                                                                         |
|-----------------------------------------------------------------------------------------------------------------------------------------|
| C <sub>2</sub> : Medium salt content. Provision must be made for leaching of salts and plants sensitive to brakishness must be avoided. |
| S <sub>1</sub> : Low Sodium: Can be used for irrigation - contains a low brakish danger.                                                |

### Irrigation water - type

|         |        |                                                                                                                                                                            |
|---------|--------|----------------------------------------------------------------------------------------------------------------------------------------------------------------------------|
| EC mS/m | 0-25   | C <sub>1</sub> : Low salt content: No danger for brakishness on well drained soils.                                                                                        |
|         | 26-75  | C <sub>2</sub> : Medium salt content. Provision must be made for leaching of salts and plants sensitive to brakishness must be avoided.                                    |
|         | 76-225 | C <sub>3</sub> : High salt content. Can only be used on soils with a good drainage. Leaching is needed periodically and plants sensitive to brakish water must be avoided. |
|         | >225   | C <sub>4</sub> : Very high salt content. Not fit for irrigation under normal conditions. Can be used in an emergency on sandy soils.                                       |

### SAR

|         |                                                                                               |
|---------|-----------------------------------------------------------------------------------------------|
| 0 - 10  | S <sub>1</sub> : Low Sodium: Can be used for irrigation - contains a low brakish danger.      |
| 10 - 18 | S <sub>2</sub> : Medium Sodium: Mainly to be used on sandy soils with a very good drainage.   |
| 18 - 26 | S <sub>3</sub> : High Sodium: Not to be used on soils with limited drainage.                  |
| 26 - 34 | S <sub>4</sub> : Very high sodium: Not fit for irrigation because of the high sodium content. |
