# Supplementary material for: The Influence of Non-Engineered Municipal Landfills on Groundwater Chemistry and Quality in Bloemfontein, South Africa
Source: Molecules. 2020 Nov 28;25(23):5599. doi: 10.3390/molecules25235599 (PMC7731076; doi:10.3390/molecules25235599)
Supplement: Supplementary file 1 [file molecules-25-05599-s001.zip]

Archive with 4 entries (4 files):
- mdpi_references_guide_v5.pdf
- winter north and south.pdf
- autumn south.pdf
- autumn north.pdf
